# Supplementary material for: Changes in Care Associated With Integrating Medicare and Medicaid for Dual-Eligible Individuals
Source: PubMed Central journal article supplement (PMC10739174; doi:10.1001/jamahealthforum.2023.4583), 2023-12-21
Supplement: jamahealthforum-e234583-s002.pdf [file jamahealthforum-e234583-s002.pdf]

## Data Sharing Statement

Roberts. Changes in Care Associated With Integrating Medicare and Medicaid for Dual-Eligible Individuals. *JAMA Health Forum*. Published December 21, 2023.

doi:10.1001/jamahealthforum.2023.4583

### Data

**Data available:** No

### Additional Information

**Explanation for why data not available:** We are unable to share individual patient data due to prohibitions of our Data Use Agreements with data providers. We will make a codebook and full analytic code publicly available on a public repository (e.g., Figshare) along with a readme file to orient users to this documentation. We have enclosed the following statement in the acknowledgements: Analytic code for this study has been posted on Figshare, an online repository (DOI: 10.6084/m9.figshare.24224284), including a directory and readme files to orient users to the analytic code
